# Supplementary material
Source: MDPI journal article supplement (https://www.mdpi.com/2071-1050/14/22/14855)
Supplement: s1 [file s1]

Archive with 6 entries (6 files):
- CASP Phipps et al 2013 ed.pdf
- CASP Rakib et al 2022.pdf
- CASP Sawtri et al 2015 ed.pdf
- Font et al 2016 McMaster Quantitative review.pdf
- Lin & Hsu 2015 McMaster Quantitative.pdf
- Preko 2017 McMaster Quantitative review.pdf
