# Supplementary material
Source: MDPI journal article supplement (https://www.mdpi.com/2071-1050/14/22/14855)
Supplement: s1 [file s1 › CASP Sawtri et al 2015 ed.pdf]

# Critical Review Form – Qualitative Studies (Version 2.0)

© Letts, L., Wilkins, S., Law, M., Stewart, D., Bosch, J., & Westmorland, M., 2007  
McMaster University

## CITATION:

Sawitri, D.R.; Hadiyanto,H.; Hadi, S.P. Pro-environmental behaviour from a social cognitive perspective. *Procedia Environ, Sci.* 2015, 23, 27-33

|                                                                                                                                                                                                                                                                      | Comments                                                                                                                                                                                                                                                                                                                                                                                                                                                                                                                                                                                                                                                                                                                                                                                                                         |
|----------------------------------------------------------------------------------------------------------------------------------------------------------------------------------------------------------------------------------------------------------------------|----------------------------------------------------------------------------------------------------------------------------------------------------------------------------------------------------------------------------------------------------------------------------------------------------------------------------------------------------------------------------------------------------------------------------------------------------------------------------------------------------------------------------------------------------------------------------------------------------------------------------------------------------------------------------------------------------------------------------------------------------------------------------------------------------------------------------------|
| <b>STUDY PURPOSE:</b><br><br>Was the purpose and/or research question stated clearly?<br><input checked="" type="radio"/> yes<br><input type="radio"/> no                                                                                                            | Outline the purpose of the study and/or research question.<br><br>An established theoretical framework is needed to understand the development of environmentally friendly behaviours. The objective of this study was to propose a social cognitive theory perspective as one of the psychological theories that can be applied to explain pro-environmental behaviour.                                                                                                                                                                                                                                                                                                                                                                                                                                                         |
| <b>LITERATURE:</b><br><br>Was relevant background literature reviewed?<br><input checked="" type="radio"/> yes<br><input type="radio"/> no                                                                                                                           | Describe the justification of the need for this study. Was it clear and compelling?<br><br>Understanding pro-environmental behaviour is crucial as it will contribute to theory development related to pro-environmental behaviour management and inform the policymaker when devising interventions to encourage pro-environmental behaviour. Previous studies have used the theory of planned behaviour, norm activation theory, and values-beliefs norms theory to explain pro-environmental behaviour. However, the use of social-cognitive theory to explain pro-environmental behaviour is lacking. This study summarises previous studies which have been using social-cognitive constructs and describes the SCT perspective for understanding a variety of routes to promote pro-environmental behaviour.<br><b>YES</b> |
|                                                                                                                                                                                                                                                                      | How does the study apply to your practice and/or to your research question? Is it worth continuing this review? <sup>1</sup><br><br>This study reviewed theories of behaviour and discussed the possible application of SCT and relevant constructs as suitable for understanding and studying green consumer behaviour.<br><b>YES</b>                                                                                                                                                                                                                                                                                                                                                                                                                                                                                           |
| <b>STUDY DESIGN:</b><br><br>What was the design?<br><input type="radio"/> phenomenology<br><input type="radio"/> ethnography<br><input type="radio"/> grounded theory<br><input type="radio"/> participatory action research<br><input type="radio"/> other<br>_____ | Was the design appropriate for the study question? (i.e., rationale) Explain.<br><br>The study design was not explained. The article was written as a review article of applicable theories of consumer behaviour.                                                                                                                                                                                                                                                                                                                                                                                                                                                                                                                                                                                                               |

<sup>1</sup> When doing critical reviews, there are strategic points in the process at which you may decide the research is not applicable to your practice and question. You may decide then that it is not worthwhile to continue with the review.

|                                                                                                                                                                                                                                                                                                                                                                                                                                                                                                                                                    |                                                                                                                                                                                                                                                                                                                                                                                                                                                                                                                                                                                     |
|----------------------------------------------------------------------------------------------------------------------------------------------------------------------------------------------------------------------------------------------------------------------------------------------------------------------------------------------------------------------------------------------------------------------------------------------------------------------------------------------------------------------------------------------------|-------------------------------------------------------------------------------------------------------------------------------------------------------------------------------------------------------------------------------------------------------------------------------------------------------------------------------------------------------------------------------------------------------------------------------------------------------------------------------------------------------------------------------------------------------------------------------------|
| <p>Was a theoretical perspective identified?</p> <p><input checked="" type="radio"/> yes</p> <p><input type="radio"/> no</p>                                                                                                                                                                                                                                                                                                                                                                                                                       | <p>Describe the theoretical or philosophical perspective for this study e.g., researcher's perspective.</p> <p>The study elaborated on several theories but indicated why they chose and applied the SCT.</p>                                                                                                                                                                                                                                                                                                                                                                       |
| <p>Method(s) used:</p> <p><input type="radio"/> participant observation</p> <p><input type="radio"/> interviews</p> <p><input checked="" type="radio"/> document review</p> <p><input type="radio"/> focus groups</p> <p><input checked="" type="radio"/> other</p> <p>_____</p>                                                                                                                                                                                                                                                                   | <p>Describe the method(s) used to answer the research question. Are the methods congruent with the philosophical underpinnings and purpose?</p> <p>Critical concepts of the chosen theories were discussed, and the SCT was applied to show that it can be a suitable theory for understanding green consumer behaviour. However, the authors focused more on seminal theories and their authors than on reviewing articles.</p>                                                                                                                                                    |
| <p><b>SAMPLING:</b></p> <p>Was the process of purposeful selection described?</p> <p><input type="radio"/> yes</p> <p><input checked="" type="radio"/> no</p>                                                                                                                                                                                                                                                                                                                                                                                      | <p>Describe sampling methods used. Was the sampling method appropriate to the study purpose or research question?</p> <p>There were no sampling methods discussed. However, the authors discussed previous studies and the theories they have used to explain pro-environmental behaviour, such as the theory of reasoned action, the theory of planned behaviour, norm activation theory and values-beliefs-norms theory. They discussed these theories and concepts that are applicable but identified a gap regarding the use of SCT to explain pro-environmental behaviour.</p> |
| <p>Was sampling done until redundancy in data was reached?<sup>2</sup></p> <p><input type="radio"/> yes</p> <p><input type="radio"/> no</p> <p><input checked="" type="radio"/> not addressed</p>                                                                                                                                                                                                                                                                                                                                                  | <p>Are the participants described in adequate detail? How is the sample applicable to your practice or research question? Is it worth continuing?</p> <p>The information keeps repeating itself in other articles that I have studied, which makes the information in this article valid and valuable for my review article.</p>                                                                                                                                                                                                                                                    |
| <p>Was informed consent obtained?</p> <p><input type="radio"/> yes</p> <p><input type="radio"/> no</p> <p><input checked="" type="radio"/> not addressed</p>                                                                                                                                                                                                                                                                                                                                                                                       |                                                                                                                                                                                                                                                                                                                                                                                                                                                                                                                                                                                     |
| <p><b>DATA COLLECTION:</b></p> <p><b>Descriptive Clarity</b></p> <p>Clear &amp; complete description of</p> <p>site: <input type="radio"/> yes <input checked="" type="radio"/> no</p> <p>participants: <input type="radio"/> yes <input checked="" type="radio"/> no</p> <p>Role of researcher &amp; relationship with participants:</p> <p><input type="radio"/> yes <input checked="" type="radio"/> no</p> <p>Identification of assumptions and biases of researcher:</p> <p><input checked="" type="radio"/> yes <input type="radio"/> no</p> | <p>Describe the context of the study. Was it sufficient for understanding of the “whole” picture?</p> <p><input checked="" type="radio"/> Yes</p> <p>What was missing and how does that influence your understanding of the research?</p> <p>In our opinion, the article gave valuable insight and added to the existing rich literature regarding theories and their building block, seminal authors and application to pro-environmental behaviour.</p>                                                                                                                           |

<sup>2</sup> Throughout the form, “no” means the authors explicitly state reasons for not doing it; “not addressed” should be ticked if there is no mention of the issue.

|                                                                                                                                                                                                                                                                                                                                          |                                                                                                                                                                                                                                                                                                                                                                                                                                                                                                                                                                                                           |
|------------------------------------------------------------------------------------------------------------------------------------------------------------------------------------------------------------------------------------------------------------------------------------------------------------------------------------------|-----------------------------------------------------------------------------------------------------------------------------------------------------------------------------------------------------------------------------------------------------------------------------------------------------------------------------------------------------------------------------------------------------------------------------------------------------------------------------------------------------------------------------------------------------------------------------------------------------------|
| <p><b>Procedural Rigour</b><br/> Procedural rigor was used in data collection strategies?<br/> <input type="radio"/> yes<br/> <input type="radio"/> no<br/> <input checked="" type="radio"/> not addressed</p>                                                                                                                           | <p>Do the researchers provide adequate information about data collection procedures e.g., gaining access to the site, field notes, training data gatherers? Describe any flexibility in the design &amp; data collection methods.</p>                                                                                                                                                                                                                                                                                                                                                                     |
| <p><b>DATA ANALYSES:</b></p> <p><b>Analytical Rigour</b><br/> Data analyses were inductive?<br/> <input type="radio"/> yes <input type="radio"/> no <input checked="" type="radio"/> not addressed</p> <p>Findings were consistent with &amp; reflective of data?<br/> <input checked="" type="radio"/> yes <input type="radio"/> no</p> | <p>Describe method(s) of data analysis. Were the methods appropriate? What were the findings?</p> <p>After evaluating the concepts of the chosen theories and concluding that the SCT can also be used as a valuable theory, the assumptions of the SCT were discussed and also applied to a valuable framework, which was discussed</p>                                                                                                                                                                                                                                                                  |
| <p><b>Auditability</b><br/> Decision trail developed?<br/> <input checked="" type="radio"/> yes <input type="radio"/> no <input type="radio"/> not addressed</p> <p>Process of analyzing the data was described adequately?<br/> <input type="radio"/> yes <input type="radio"/> no <input checked="" type="radio"/> not addressed</p>   | <p>Describe the decisions of the researcher re: transformation of data to codes/themes. Outline the rationale given for development of themes.</p> <p>The process of how the themes were concluded is not discussed. However, from the paper, it is evident that the authors' used a form of coding to gather certain concepts and assumptions under certain names. These codes or themes coincided with the key building blocks of SCT.</p>                                                                                                                                                              |
| <p><b>Theoretical Connections</b><br/> Did a meaningful picture of the phenomenon under study emerge?<br/> <input checked="" type="radio"/> yes<br/> <input type="radio"/> no</p>                                                                                                                                                        | <p>How were concepts under study clarified &amp; refined, and relationships made clear? Describe any conceptual frameworks that emerged.</p> <p>A conceptual framework was used (applicable to career-related choices) to show how the identified concepts can fit into this framework and also unify the SCT as an environmental psychology. They used this framework and adapted it to pro-environmental behaviour and discussed the identified aspects, gave examples where some of these aspects have been used in research and how it can be valuable to understand pro-environmental behaviour.</p> |
