# Supplementary material
Source: MDPI journal article supplement (https://www.mdpi.com/2071-1050/14/22/14855)
Supplement: s1 [file s1 › Preko 2017 McMaster Quantitative review.pdf]

# Modified McMaster Critical Review form

Fields in 'red text' have been added. Maximum score = 17 (depending on the type of study, for example, if study was not a randomised controlled trial then randomisation components were marked as NA thus changing the total score).

**Preko, A.K. Analysis of social cognitive model in the context of green marketing: a study of the Ghanaian environment. *Bus. Perspect. Res.* 2017, 5, 86-99**

| Assessment Components                                         | Yes | No | Not addressed | Not Applicable |
|---------------------------------------------------------------|-----|----|---------------|----------------|
| <b>Study Purpose</b>                                          |     |    |               |                |
| Was the purpose of the study clearly stated?                  | 1   |    |               |                |
| <b>Literature Review</b>                                      |     |    |               |                |
| Was relevant background literature reviewed?                  | 2   |    |               |                |
| <b>Study Design</b>                                           |     |    |               |                |
| RCT                                                           |     |    |               |                |
| cohort                                                        |     |    |               |                |
| single case design                                            |     |    |               |                |
| before and after                                              |     |    |               |                |
| case control                                                  |     |    |               |                |
| cross sectional                                               | 3   |    |               |                |
| case study                                                    |     |    |               |                |
| <b>Sample</b>                                                 | Yes | No | Not addressed | Not Applicable |
| Was the sample described in detail?                           | 4   |    |               |                |
| Was sample size justified?                                    | 5   |    |               |                |
| Were the groups randomised?                                   | 6   |    |               |                |
| Was randomising appropriately done?                           | 7   |    |               |                |
| Was pes planus measure reliable (moderate or good)            |     |    |               | N/A            |
| <b>Outcomes</b>                                               | Yes | No | Not addressed | Not Applicable |
| Were the outcome measures reliable?                           | 8   |    |               |                |
| Were the outcome measures valid?                              | 9   |    |               |                |
| <b>Intervention</b>                                           |     |    |               | N/A            |
| Intervention was described in detail?                         |     |    |               | N/A            |
| Contamination was avoided?                                    |     |    |               | N/A            |
| Cointervention was avoided?                                   |     |    |               | N/A            |
| <b>Results</b>                                                | Yes | No | Not addressed | Not Applicable |
| Results were reported in terms of statistical significance    | 10  |    |               |                |
| Were the analysis method/s appropriate?                       | 11  |    |               |                |
| Clinical importance was reported?                             | 12  |    |               |                |
| Drop-outs were reported?                                      | 13  |    |               |                |
| <b>Conclusions and clinical implications</b>                  | Yes | No | Not addressed | Not Applicable |
| Conclusions were appropriate given study methods and results? | 14  |    |               |                |
